# Supplementary material for: Soluble Fn14 Is Detected and Elevated in Mouse and Human Kidney Disease
Source: PubMed Central journal article supplement (PMC4865213; doi:10.1371/journal.pone.0155368), 2016-05-12
Supplement: pone.0155368.s002.pdf [file pone.0155368.s002.pdf]

## Figure S2: Correlation of sFn14 with Serum Creatinine/BUN and kidney Fn14 mRNA expression in FA/AKI model

### A) Serum sFn14 vs Serum Creatinine

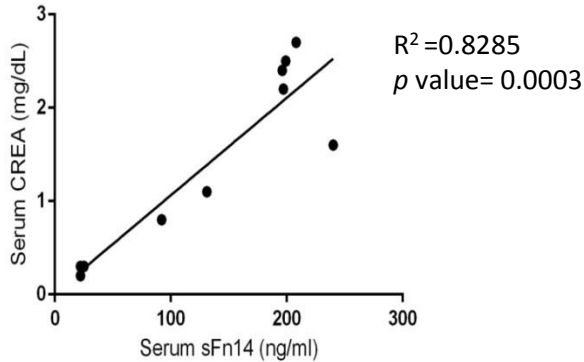

### B) Serum sFn14 vs Serum BUN

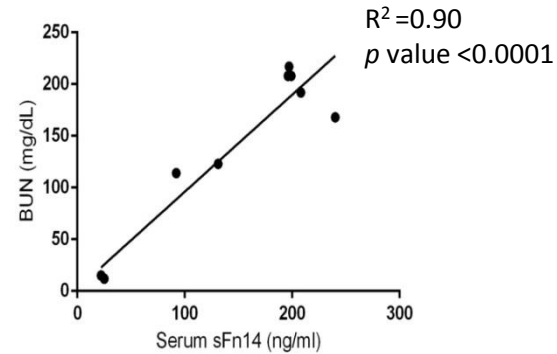

### C) Urine Fn14 vs kidney Fn14 expression

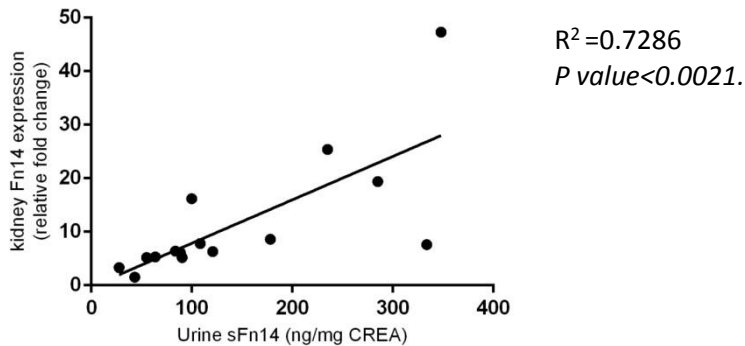

**Figure S2:** Linear regression graphs showing correlation of sFn14 with A) Creatinine, B) BUN and C) Fn14 mRNA in kidney in FA/AKI model. Serum sFn14 strongly correlated with serum Creatinine ( $R^2=0.8285$ ;  $p < 0.0003$  Spearman's correlation) and BUN ( $R^2=0.9$ ;  $p < 0.0001$ ) (A and B). Urine Fn14 also correlated significantly ( $R^2 = 0.7286$ ;  $p < 0.0021$ ) with Fn14 mRNA expression in kidney (C).
