# Supplementary material for: Soluble Fn14 Is Detected and Elevated in Mouse and Human Kidney Disease
Source: PubMed Central journal article supplement (PMC4865213; doi:10.1371/journal.pone.0155368), 2016-05-12
Supplement: pone.0155368.s004.pdf [file pone.0155368.s004.pdf]

**Table S1: Clinical Characteristics of DN Patients Studied**

| <b>Table S1. Patient characteristics</b> |                      |          |            |                          |                                          |                                          |
|------------------------------------------|----------------------|----------|------------|--------------------------|------------------------------------------|------------------------------------------|
| <b>Sample matrix</b>                     | <b>Diagnosis</b>     | <b>n</b> | <b>Age</b> | <b>Sex (male/female)</b> | <b>uAlbumin/creatinine ratio (ug/mg)</b> | <b>uProtein/creatinine ratio (mg/mg)</b> |
| Urine                                    | Healthy              | 10       | 51.3±4.9   | 0/10                     | 17.8±20.91                               | 0.06±0.03                                |
| Urine                                    | Diabetic nephropathy | 26       | 59.8± 8.7  | 15/11                    | 807.2±1386*                              | 1.11±1.91*                               |
| Plasma                                   | Healthy              | 32       | 39.9±12.7  | 27/5                     | N/A                                      | N/A                                      |

\* p<0.005, urine healthy vs DN
